# Supplementary material for: Mechanical Processing of Hermetia illucens Larvae and Bombyx mori Pupae Produces Oils with Antimicrobial Activity
Source: PubMed Central journal article supplement (PMC8001418; doi:10.3390/ani11030783), 2021-03-11
Supplement: animals-11-00783-s001.pdf [file animals-11-00783-s001.pdf]

Supplementary Material

# Mechanical Processing of *Hermetia illucens* Larvae and *Bombyx mori* Pupae Produces Oils with Antimicrobial Activity

Alessio Saviane <sup>1</sup>, Luca Tassoni <sup>2</sup>, Daniele Naviglio <sup>3</sup>, Daniela Lupi <sup>4</sup>, Sara Savoldelli <sup>4</sup>, Giulia Bianchi <sup>5</sup>, Giovanna Cortellino <sup>5</sup>, Paolo Bondioli <sup>6</sup>, Liliana Folegatti <sup>7</sup>, Morena Casartelli <sup>8</sup>, Viviana Teresa Orlandi <sup>9</sup>, Gianluca Tettamanti <sup>9</sup> and Silvia Cappellozza <sup>1,\*</sup>

- <sup>1</sup> Consiglio per la Ricerca in Agricoltura e l'Analisi dell'Economia Agraria, Centro di Ricerca Agricoltura e Ambiente (CREA-AA), 35143 Padova, Italy; alessio.saviane@crea.gov.it
- <sup>2</sup> Istituto Zooprofilattico Sperimentale delle Venezie, 35020 Legnaro, Padova, Italy; ltassoni@izsvnezie.it
- <sup>3</sup> Dipartimento di Scienze Chimiche, Università di Napoli "Federico II", 80126 Napoli, Italy; naviglio@unina.it
- <sup>4</sup> Dipartimento Scienze per gli Alimenti, la Nutrizione e l'Ambiente, Università degli Studi di Milano, 20133 Milano, Italy; daniela.lupi@unimi.it (D.L.); sara.savoldelli@unimi.it (S.S.)
- <sup>5</sup> Consiglio per la Ricerca in Agricoltura e l'Analisi dell'Economia Agraria, Centro di Ricerca Ingegneria e Trasformazioni Agroalimentari (CREA-IT), 20133 Milano, Italy; giulia.bianchi@crea.gov.it (G.B.); giovanna.cortellino@crea.gov.it (G.C.)
- <sup>6</sup> Freelance Expert, 20133 Milano, Italy; paolo.bondioli1956@gmail.com
- <sup>7</sup> Innovhub, Laboratorio sostanze grasse, derivati e tecnologie olearie, 20133 Milano, Italy; liliana.folegatti@mi.camcom.it
- <sup>8</sup> Dipartimento di Bioscienze, Università degli Studi di Milano, 20133 Milano, Italy; morena.casartelli@unimi.it
- <sup>9</sup> Dipartimento di Biotecnologie e Scienze della Vita, Università degli Studi dell'Insubria, 21100 Varese, Italy; viviana.orlandi@uninsubria.it (V.T.O.); gianluca.tettamanti@uninsubria.it (G.T.)
- \* Correspondence: silvia.cappellozza@crea.gov.it

**Citation:** Saviane, A.; Tassoni, L.; Naviglio, D.; Lupi, D.; Savoldelli, S.; Bianchi, G.; Cortellino, G.; Bondioli, P.; Folegatti, L.; Casartelli, M.; et al. Mechanical Processing of *Hermetia illucens* Larvae and *Bombyx mori* Pupae Allows to Obtain Oil with Antimicrobial Activity. *Animals* **2021**, *11*, 783.  
<https://doi.org/10.3390/ani11030783>

Academic editor: Laura Gasco

Received: 1 January 2021

Accepted: 4 March 2021

Published: 11 March 2021

**Publisher's Note:** MDPI stays neutral with regard to jurisdictional claims in published maps and institutional affiliations.

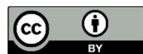

**Copyright:** © 2021 by the authors. Licensee MDPI, Basel, Switzerland. This article is an open access article distributed under the terms and conditions of the Creative Commons Attribution (CC BY) license (<http://creativecommons.org/licenses/by/4.0/>).

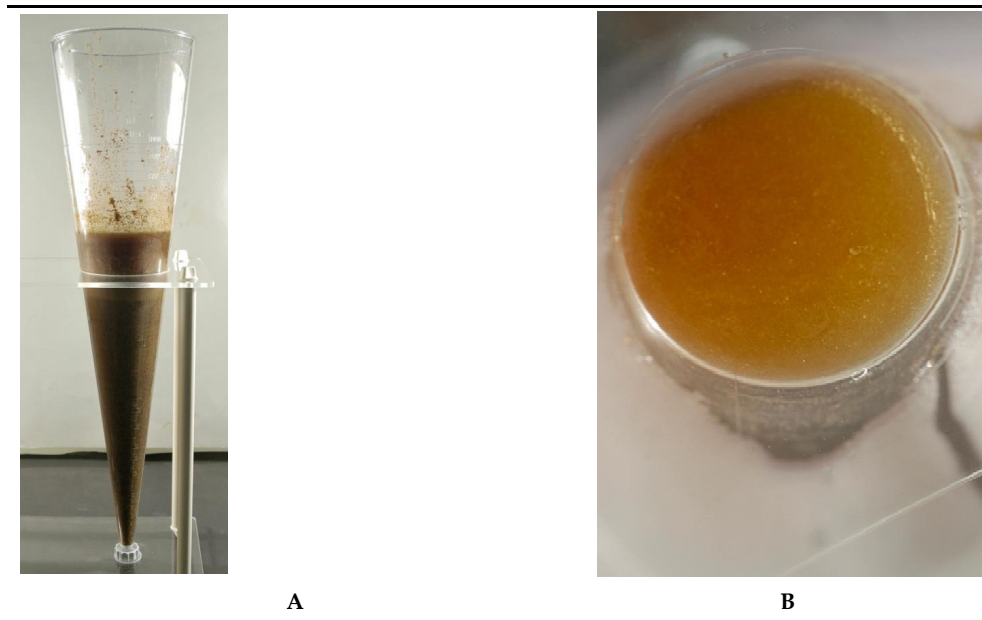

Figure S1. A) BSFL meal sedimentation; B) Surfacing of meal lipids.

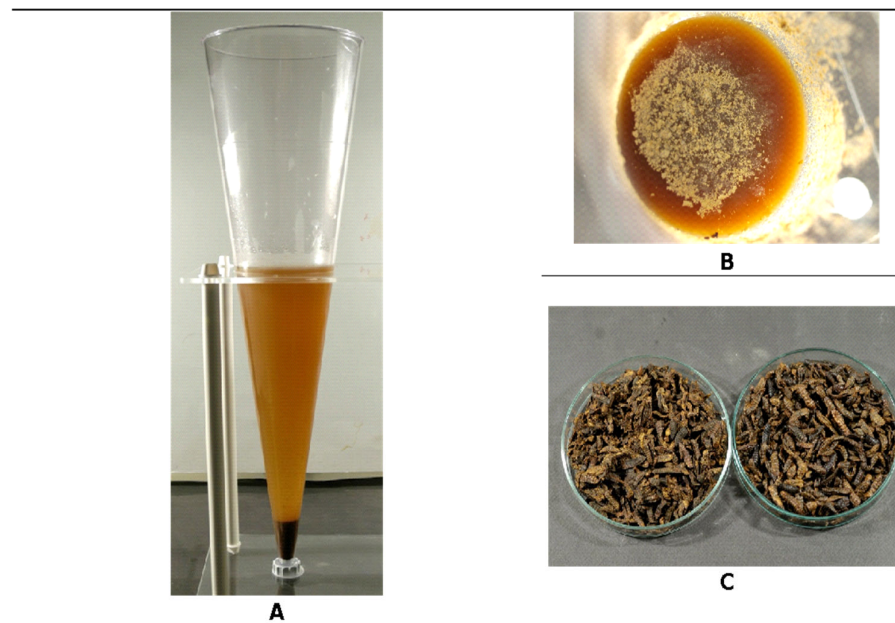

Figure S2. A) BSF whole larvae sedimentation; B) Surfacing of larvae lipids; C) Larvae before (left) and after (right) treatment

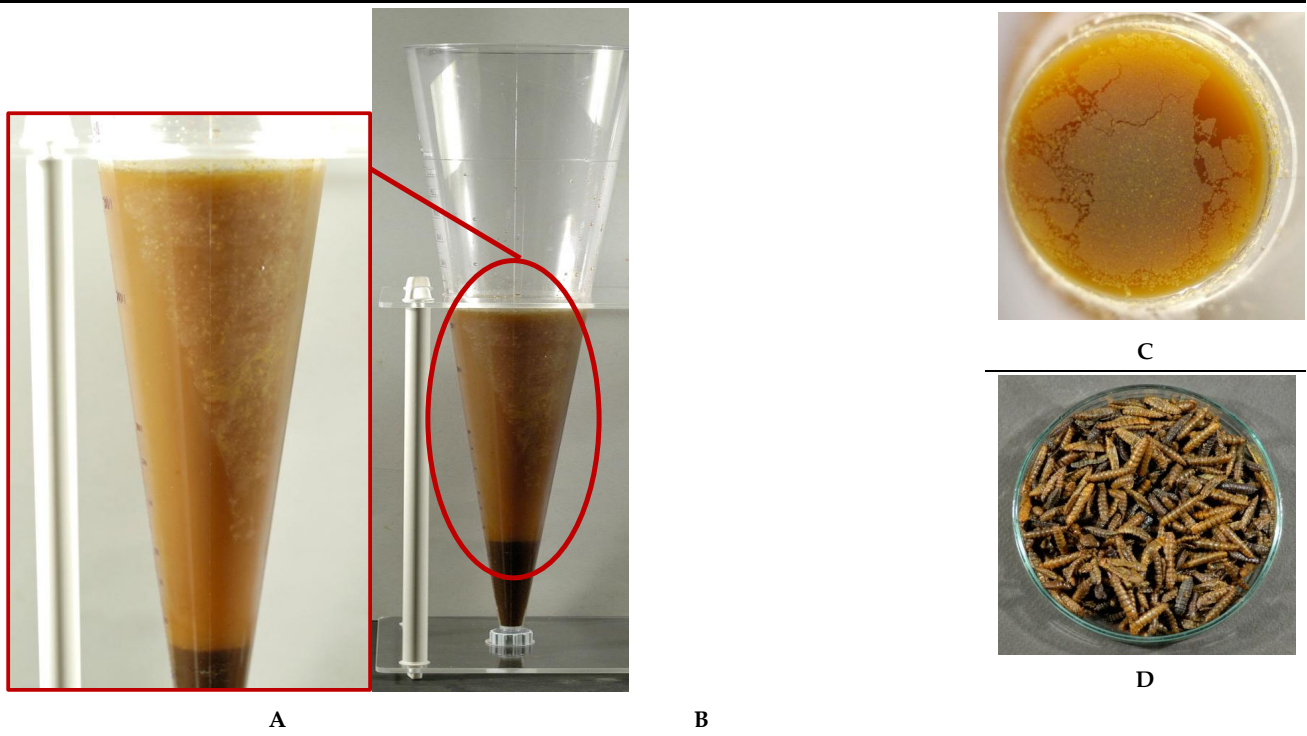

**Figure S3.** A–B) BSF larvae sedimentation and solidified lipids distributed in almost all the water amount; C) Surfacing of larvae lipids; D) Larvae after 1 h extraction with water at 100 °C.

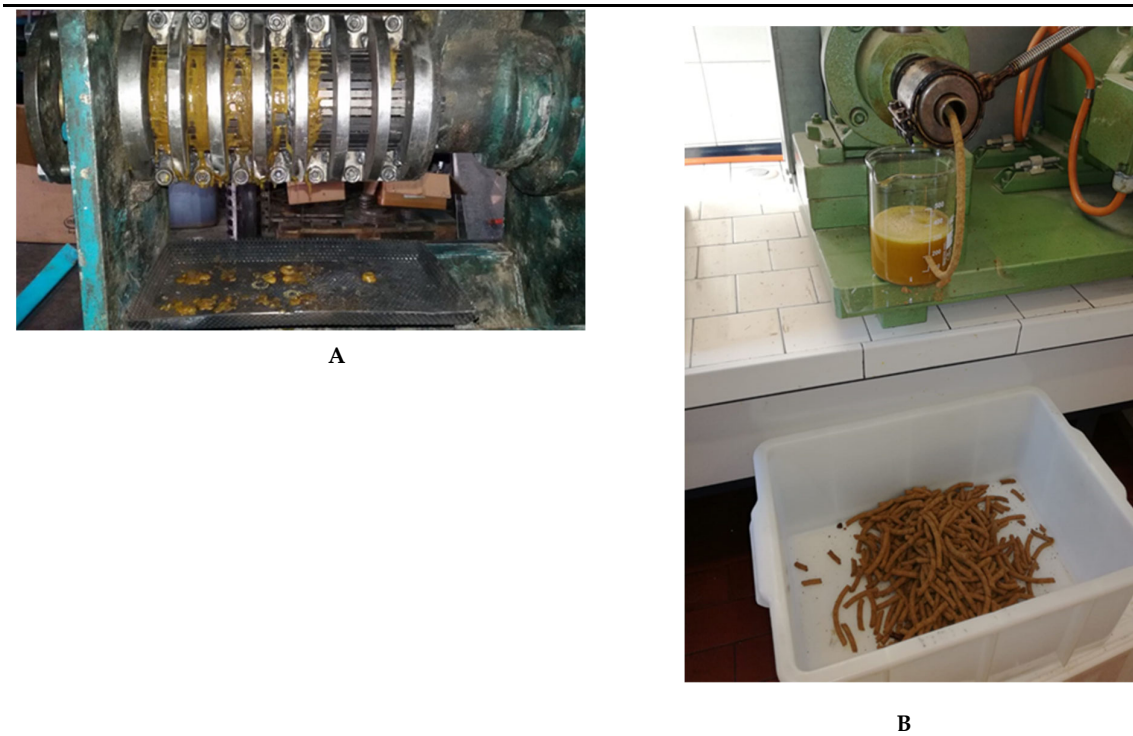

**Figure S4.** A) Mechanical pressing of *H. illucens* larvae; B) mechanical pressing of *B. mori* pupae.

**Table S1.** Fatty acids contained in BSF non-defatted meal and oil.

| Fatty Acids            | Notation      | Non-defatted Meal | Extracted Oil    |
|------------------------|---------------|-------------------|------------------|
|                        |               | Mean $\pm$ SD     | Mean $\pm$ SD    |
| Caproic                | C6:0          | 0.02 $\pm$ 0.01   | 0.01 $\pm$ 0.00  |
| Enanthic               | C7:0          | 0.02 $\pm$ 0.00   | 0.01 $\pm$ 0.00  |
| Caprylic               | C8:0          | 0.03 $\pm$ 0.01   | 0.02 $\pm$ 0.00  |
| Pelargonic             | C9:0          | 0.05 $\pm$ 0.01   | 0.04 $\pm$ 0.00  |
| Capric                 | C10:0         | 0.83 $\pm$ 0.00   | 0.89 $\pm$ 0.00  |
| Undecanoic             | C11:0         | 0.03 $\pm$ 0.00   | 0.03 $\pm$ 0.00  |
| Undecenoic             | C11:1         | 0.03 $\pm$ 0.00   | 0.03 $\pm$ 0.00  |
| Dodecanoic, anteiso    | C12:0 anteiso | 0.03 $\pm$ 0.01   | 0.00 $\pm$ 0.00  |
| Lauric                 | C12:0         | 38.31 $\pm$ 0.00  | 42.45 $\pm$ 0.09 |
| Dodecenoic, cis        | C12:1c        | 0.06 $\pm$ 0.00   | 0.08 $\pm$ 0.00  |
| Dodecenoic, trans      | C12:1t        | 0.05 $\pm$ 0.00   | 0.06 $\pm$ 0.00  |
| Tridecanoic, iso       | C13:0 iso     | 0.03 $\pm$ 0.00   | 0.03 $\pm$ 0.00  |
| Tridecanoic, anteiso   | C13:0 anteiso | 0.05 $\pm$ 0.00   | 0.05 $\pm$ 0.00  |
| Tridecanoic            | C13:0         | 0.05 $\pm$ 0.00   | 0.04 $\pm$ 0.00  |
| Tetradecanoic, iso     | C14:0 iso     | 0.08 $\pm$ 0.01   | 0.06 $\pm$ 0.00  |
| Myristic               | C14:0         | 7.94 $\pm$ 0.00   | 8.23 $\pm$ 0.01  |
| Tetradecenoic, trans   | C14:1t        | 0.08 $\pm$ 0.00   | 0.07 $\pm$ 0.00  |
| Tetradecenoic, n-7     | C14:1n7       | 0.05 $\pm$ 0.02   | 0.04 $\pm$ 0.00  |
| Tetradecenoic, n-5     | C14:1n5       | 0.27 $\pm$ 0.00   | 0.30 $\pm$ 0.00  |
| Pentadecanoic, iso     | C15:0 iso     | 0.11 $\pm$ 0.01   | 0.08 $\pm$ 0.00  |
| Pentadecanoic, anteiso | C15:0 anteiso | 0.2 $\pm$ 0.01    | 0.15 $\pm$ 0.00  |
| Pentadecanoic          | C15:0         | 0.33 $\pm$ 0.00   | 0.28 $\pm$ 0.00  |
| Pentadecenoic, trans   | C15:1t        | 0.12 $\pm$ 0.03   | 0.11 $\pm$ 0.01  |
| Esadecanoic iso        | C16:0 iso     | 0.12 $\pm$ 0.01   | 0.09 $\pm$ 0.00  |
| Palmitic               | C16:0         | 16.93 $\pm$ 0.03  | 15.35 $\pm$ 0.03 |
| Hexadecenoic, n-9      | C16:1n9       | 0.37 $\pm$ 0.00   | 0.32 $\pm$ 0.00  |
| Hexadecenoic, n-7      | C16:1n7       | 4.17 $\pm$ 0.01   | 4.02 $\pm$ 0.01  |
| Hexadecenoic, trans    | C16:1t        | 0.02 $\pm$ 0.01   | 0.02 $\pm$ 0.00  |
| Heptadecanoic, iso     | C17:0 iso     | 0.09 $\pm$ 0.01   | 0.08 $\pm$ 0.00  |
| Heptadecanoic, anteiso | C17:0 anteiso | 0.13 $\pm$ 0.00   | 0.10 $\pm$ 0.00  |
| Heptadecanoic          | C17:0         | 0.36 $\pm$ 0.01   | 0.32 $\pm$ 0.00  |
| Heptadecenoic, n-7     | C17:1n7       | 0.33 $\pm$ 0.03   | 0.28 $\pm$ 0.01  |
| Heptadecenoic, trans   | C17:1t        | 0.06 $\pm$ 0.01   | 0.05 $\pm$ 0.00  |
| Hexadecadienoic        | C16:2         | 0.06 $\pm$ 0.00   | 0.06 $\pm$ 0.01  |
| Stearic                | C18:0         | 3.31 $\pm$ 0.00   | 2.95 $\pm$ 0.01  |
| Oleic                  | C18:1n9       | 15.14 $\pm$ 0.02  | 13.53 $\pm$ 0.03 |
| Octadecenoic, n-7      | C18:1n7c      | 0.83 $\pm$ 0.01   | 0.78 $\pm$ 0.01  |

|                                  |                   |             |             |
|----------------------------------|-------------------|-------------|-------------|
| Linoleic                         | C18:2n6 linoleic  | 6.02 ± 0.01 | 5.3 ± 0.00  |
| Nonadecanoic                     | C19:0             | 0.02 ± 0.00 | 0.02 ± 0.00 |
| α-Linolenic                      | C18:3n3           | 0.79 ± 0.00 | 0.8 ± 0.03  |
| Conjugated linoleic 9c, 11t      | CLA c9t11         | 1.38 ± 0.01 | 1.51 ± 0.01 |
| Conjugated others                | CLA               | 0.03 ± 0.00 | 0.02 ± 0.01 |
| Conjugated linoleic trans, trans | CLA <sub>tt</sub> | 0.03 ± 0.00 | 0.04 ± 0.00 |
| Arachidic                        | C20:0             | 0.09 ± 0.01 | 0.09 ± 0.02 |
| Octadecatetraenoic               | C18:4n4           | 0.3 ± 0.01  | 0.36 ± 0.00 |
| Eicosenoic                       | C20:1n9           | 0.07 ± 0.01 | 0.07 ± 0.00 |
| Eicosadenoic                     | C20:2n6           | 0.04 ± 0.01 | 0.04 ± 0.00 |
| Eicosatrienoic                   | C20:3n6           | 0.39 ± 0.00 | 0.63 ± 0.17 |
| Arachidonic                      | C20:4n6           | 0.07 ± 0.00 | 0.05 ± 0.01 |
| Eicosapentaenoic                 | C20:5n3 EPA       | 0.04 ± 0.01 | 0.05 ± 0.01 |
| Behenic                          | C22:0             | 0.05 ± 0.02 | 0.04 ± 0.00 |
| SFA/UFA ratio                    |                   | 2.25        | 2.49        |
| ω6/ω3 ratio                      |                   | 5.76        | 4.95        |

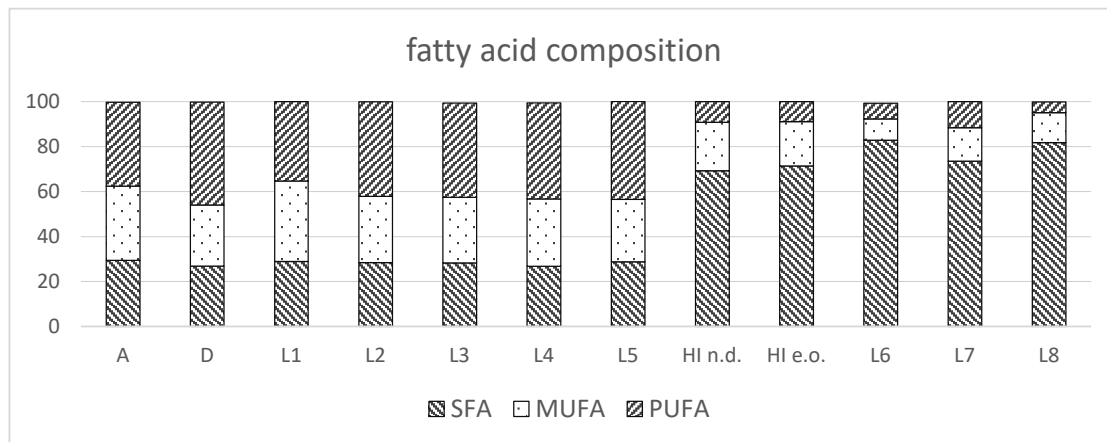

**Figure S5:** Fatty acid (SFA, MUFA, PUFA) composition of silkworm oil and BSFL oil compared to available literature. A = experimental thesis A (see Table 4); D = experimental thesis (see Table 4). L1 [50]; L2, L3 [51]; L4 [52]; L5 [53], Hi n.d. = *H. illucens* non-defatted meal (see Table 3); Hi e.o. = *H. illucens* extracted oil (see Table 3); L6 [19]; L7 [54]; L8 [55].
